# Supplementary material
Source: PubMed Central journal article supplement (PMC2575251)
Supplement: 0805065105_0805065105SI.pdf [file 0805065105_0805065105SI.pdf]

# Supporting Information

Corvol *et al.* 10.1073/pnas.0805065105

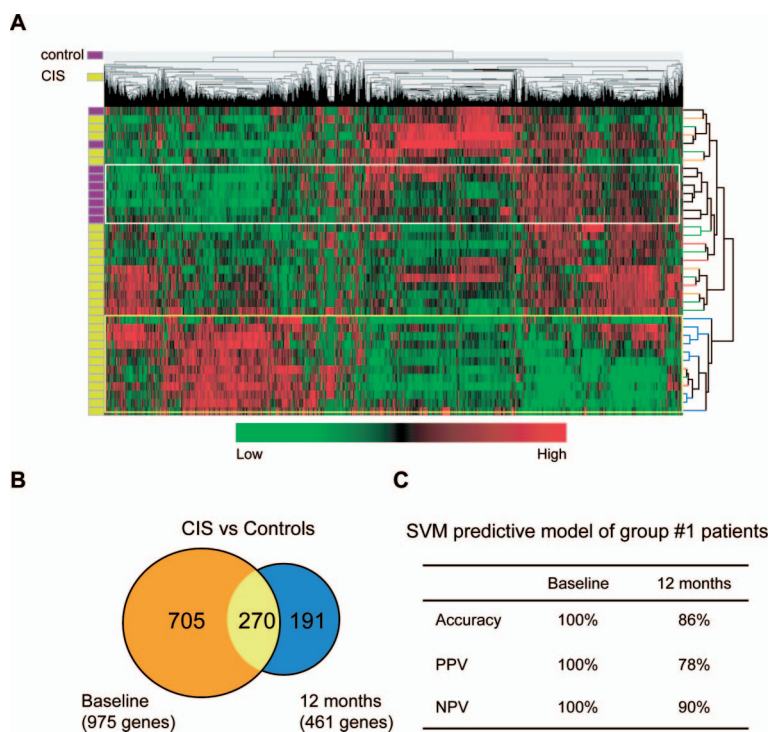

**Fig. S1.** Gene expression still differentiates group #1 from other CIS patients 1 year later. (A) Hierarchical clustering of the expression of the same 1718 genes as in Fig. 1 but obtained at 12 months. Gene and sample distances were computed as described in Fig. 1. The bars on the left indicate the class of sample: purple = control; yellow = CIS. Group #1 CIS patients are identified by blue lines in the sample's dendrogram and by a yellow box in the heatmap. Control samples are identified by a white box in the heatmap. Other CIS groups (#2, #3, and #4) are no longer identifiable. (B) Number of genes differentially expressed in CIS patients compared with controls at baseline (orange circle), at 12 months (blue circle), or on both sets (intersection). (C) A support vector machine-based predictive model was built using the expression of 108 genes that distinguished group #1 from other CIS patients. The model classified the samples at baseline (training set) with perfect accuracy. Also the predictive positive (PPV) and negative (PNV) values were 100%. When the same model was used to predict the status of samples taken 1 year later (group #1 or other CIS), the model performed between 80% and 90% in all 3 parameters.

**Table S2. Mean predictive accuracy of the top 7 gene pairs**

| Gene 1         | Gene 2          | Accuracy, % |
|----------------|-----------------|-------------|
| <i>RENT1</i>   | <i>TIMP2</i>    | 97          |
| <i>ARFGAP1</i> | <i>FYN</i>      | 96          |
| <i>ARSA</i>    | <i>FYN</i>      | 95          |
| <i>ARFGAP1</i> | <i>MAD1L1</i>   | 91          |
| <i>ARFGAP1</i> | <i>CCDC12</i>   | 89          |
| <i>IVLBL</i>   | <i>RALGDS</i>   | 87          |
| <i>ARFGAP1</i> | <i>SLC25A28</i> | 86          |

Table S3. Signature of group 1 patients

| Order | Probe set    | Symbol        | Gene description                                                | Ratio group #1/<br>other CIS | P       |
|-------|--------------|---------------|-----------------------------------------------------------------|------------------------------|---------|
| 1     | 217800_s_at  | NDFIP1        | Nedd4 family interacting protein 1                              | 3.8                          | < 1e-07 |
| 2     | 225247_at    | C19orf6       | Chromosome 19 open reading frame 6                              | 3.1                          | 1.E-05  |
| 3     | 213915_at    | NKG7          | Natural killer cell group 7 sequence                            | 2.9                          | < 1e-07 |
| 4     | 200041_s_at  | BAT1          | HLA-B associated transcript 1                                   | 2.5                          | < 1e-07 |
| 5     | 211716_x_at  | ARHGDI A      | Rho GDP dissociation inhibitor (GDI) alpha                      | 2.5                          | < 1e-07 |
| 6     | 233350_s_at  | TEX264        | Testis expressed sequence 264                                   | 2.4                          | 1.E-06  |
| 7     | 219529_at    | CLIC3         | Chloride intracellular channel 3                                | 2.4                          | < 1e-07 |
| 8     | 218607_s_at  | SDAD1         | SDA1 domain containing 1                                        | 2.3                          | < 1e-07 |
| 9     | 202652_at    | APBB1         | Amyloid beta (A4) precursor protein-binding, family B, member 1 | 2.3                          | 9.E-06  |
| 10    | 216520_s_at  | TPT1          | Tumor protein, translationally-controlled 1                     | 2.3                          | < 1e-07 |
| 11    | 1554021_a_at | ZNF12         | Zinc finger protein 12                                          | 2.2                          | < 1e-07 |
| 12    | 204122_at    | TYROBP        | TYRO protein tyrosine kinase binding protein                    | 2.2                          | < 1e-07 |
| 13    | 219878_s_at  | KLF13         | Kruppel-like factor 13                                          | 2.2                          | < 1e-07 |
| 14    | 216231_s_at  | B2M           | Beta-2-microglobulin                                            | 2.2                          | 2.E-07  |
| 15    | 219571_s_at  | ZNF12         | Zinc finger protein 12                                          | 2.1                          | < 1e-07 |
| 16    | 214450_at    | CTSW          | Cathepsin W (lymphopain)                                        | 2.1                          | < 1e-07 |
| 17    | 209050_s_at  | RALGDS        | Ral guanine nucleotide dissociation stimulator                  | 2.0                          | < 1e-07 |
| 18    | 207088_s_at  | SLC25A11      | Solute carrier family 25, member 11                             | 1.9                          | < 1e-07 |
| 19    | 1558215_s_at | UBTF          | Upstream binding transcription factor, RNA polymerase I         | 1.9                          | < 1e-07 |
| 20    | 200612_s_at  | AP2B1         | Adaptor-related protein complex 2, beta 1 subunit               | 1.9                          | < 1e-07 |
| 21    | 227266_s_at  | FYB           | FYN binding protein (FYB-120/130)                               | 1.9                          | < 1e-07 |
| 22    | 205480_s_at  | UGP2          | UDP-glucose pyrophosphorylase 2                                 | 1.8                          | < 1e-07 |
| 23    | 201831_s_at  | VDP           | Vesicle docking protein p115                                    | 1.8                          | 2.E-06  |
| 24    | 232535_at    |               | DKFZp434L201                                                    | 1.8                          | 1.E-07  |
| 25    | 244042_x_at  |               | Transcribed locus                                               | 1.8                          | 1.E-05  |
| 26    | 233713_at    | SMYD2         | SET and MYND domain containing 2                                | 1.8                          | < 1e-07 |
| 27    | 211947_s_at  | BAT2D1        | BAT2 domain containing 1                                        | 1.8                          | < 1e-07 |
| 28    | 212368_at    | ZNF292        | Zinc finger protein 292                                         | 1.7                          | < 1e-07 |
| 29    | 217854_s_at  | POLR2E        | Polymerase (RNA) II (DNA directed) polypeptide E, 25kDa         | 1.7                          | < 1e-07 |
| 30    | 217993_s_at  | MAT2B         | Methionine adenosyltransferase II, beta                         | 1.7                          | < 1e-07 |
| 31    | 236562_at    | ZNF439        | Zinc finger protein 439                                         | 1.6                          | < 1e-07 |
| 32    | 200033_at    | DDX5          | DEAD (Asp-Glu-Ala-Asp) box polypeptide 5                        | 1.6                          | 1.E-07  |
| 33    | 221895_at    | MOSPD2        | Motile sperm domain containing 2                                | 1.6                          | 8.E-07  |
| 34    | 201998_at    | ST6GAL1       | ST6 beta-galactosamide alpha-2,6-sialyltransferase 1            | 1.6                          | 1.E-07  |
| 35    | 209458_x_at  | HBA1 /// HBA2 | Hemoglobin, alpha 1 /// alpha 2                                 | 1.6                          | < 1e-07 |
| 36    | 241838_at    |               | Transcribed locus                                               | 1.5                          | < 1e-07 |
| 37    | 212540_at    | CDC34         | Cell division cycle 34                                          | 1.5                          | < 1e-07 |
| 38    | 212926_at    | SMC5L1        | SMC5 structural maintenance of chromosomes 5-like 1             | 1.5                          | < 1e-07 |
| 39    | 202283_at    | SERPINF1      | Serpin peptidase inhibitor, clade F, member 1                   | 1.5                          | < 1e-07 |
| 40    | 200735_x_at  | NACA          | Nascent-polypeptide-associated complex alpha polypeptide        | 1.5                          | < 1e-07 |
| 41    | 207460_at    | GZMM          | Granzyme M (lymphocyte met-ase 1)                               | 1.5                          | < 1e-07 |
| 42    | 211699_x_at  | HBA1 /// HBA2 | Hemoglobin, alpha 1 /// alpha 2                                 | 1.5                          | < 1e-07 |
| 43    | 208635_x_at  | NACA          | Nascent-polypeptide-associated complex alpha polypeptide        | 1.5                          | < 1e-07 |
| 44    | 209651_at    | TGFB111       | Transforming growth factor beta 1 induced transcript 1          | 1.5                          | < 1e-07 |
| 45    | 213687_s_at  | RPL35A        | Ribosomal protein L35a                                          | 1.5                          | < 1e-07 |
| 46    | 208325_s_at  | AKAP13        | A kinase (PRKA) anchor protein 13                               | 1.5                          | < 1e-07 |
| 47    | 203375_s_at  | TPP2          | Tripeptidyl peptidase II                                        | 1.4                          | 2.E-07  |
| 48    | 212063_at    | CD44          | CD44 antigen                                                    | 1.4                          | 3.E-07  |
| 49    | 235213_at    | ITPKB         | Inositol 1,4,5-trisphosphate 3-kinase B                         | 1.4                          | < 1e-07 |
| 50    | 242778_at    | LPXN          | Leupaxin                                                        | 0.8                          | < 1e-07 |
| 51    | 226843_s_at  | PAPD5         | PAP associated domain containing 5                              | 0.7                          | < 1e-07 |
| 52    | 1569599_at   | SAMS5N1       | SAM domain, SH3 domain and nuclear localisation signals, 1      | 0.7                          | 4.E-05  |
| 53    | 207111_at    | EMR1          | EGF-like module containing, mucin-like, hormone receptor-like 1 | 0.7                          | < 1e-07 |
| 54    | 242918_at    | NASP          | Nuclear autoantigenic sperm protein (histone-binding)           | 0.7                          | < 1e-07 |
| 55    | 1553861_at   | TCP11L2       | T-complex 11 (mouse) like 2                                     | 0.7                          | 2.E-05  |
| 56    | 1552807_a_at | SIGLEC10      | Sialic acid binding Ig-like lectin 10                           | 0.6                          | < 1e-07 |
| 57    | 238545_at    | BRD7          | Bromodomain containing 7                                        | 0.6                          | < 1e-07 |
| 58    | 202381_at    | ADAM9         | ADAM metallopeptidase domain 9 (meltrin gamma)                  | 0.6                          | 1.E-05  |
| 59    | 226982_at    | ELL2          | Elongation factor, RNA polymerase II, 2                         | 0.6                          | 3.E-04  |
| 60    | 202083_s_at  | SEC14L1       | SEC14-like 1 (S. cerevisiae)                                    | 0.6                          | < 1e-07 |
| 61    | 228284_at    | TLE1          | Transducin-like enhancer of split 1                             | 0.6                          | < 1e-07 |
| 62    | 222670_s_at  | MAFB          | v-maf musculoaponeurotic fibrosarcoma oncogene homolog B        | 0.6                          | < 1e-07 |
| 63    | 243296_at    | PBEF1         | Pre-B-cell colony enhancing factor 1                            | 0.6                          | 3.E-04  |

| Order | Probe set    | Symbol    | Gene description                                          | Ratio group #1/<br>other CIS | P       |
|-------|--------------|-----------|-----------------------------------------------------------|------------------------------|---------|
| 64    | 212840_at    | KIAA0794  | KIAA0794 protein                                          | 0.6                          | < 1e-07 |
| 65    | 1564164_at   | FLJ20054  | Hypothetical protein FLJ20054                             | 0.6                          | < 1e-07 |
| 66    | 204566_at    | PPM1D     | Protein phosphatase 1D magnesium-dependent, delta isoform | 0.6                          | 4.E-06  |
| 67    | 226643_s_at  | LOC134492 | NudC domain containing 2                                  | 0.6                          | < 1e-07 |
| 68    | 228049_x_at  |           | Transcribed locus                                         | 0.6                          | < 1e-07 |
| 69    | 217602_at    | PPIA      | Peptidylprolyl isomerase A (cyclophilin A)                | 0.5                          | 8.E-06  |
| 70    | 215023_s_at  | PEX1      | Peroxisome biogenesis factor 1                            | 0.5                          | 6.E-07  |
| 71    | 1567213_at   | PNN       | Pinin, desmosome associated protein                       | 0.5                          | < 1e-07 |
| 72    | 209160_at    | AKR1C3    | Aldo-keto reductase family 1, member C3                   | 0.5                          | < 1e-07 |
| 73    | 205789_at    | CD1D      | CD1D antigen, d polypeptide                               | 0.5                          | 5.E-04  |
| 74    | 208750_s_at  | ARF1      | ADP-ribosylation factor 1                                 | 0.5                          | 3.E-05  |
| 75    | 201151_s_at  | MBNL1     | muscleblind-like (Drosophila)                             | 0.5                          | < 1e-07 |
| 76    | 212649_at    |           |                                                           | 0.5                          | < 1e-07 |
| 77    | 229733_s_at  | CBX6      | Chromobox homolog 6                                       | 0.5                          | 2.E-04  |
| 78    | 203603_s_at  | ZFXH1B    | Zinc finger homeobox 1b                                   | 0.5                          | 7.E-05  |
| 79    | 201110_s_at  | THBS1     | Thrombospondin 1                                          | 0.5                          | 1.E-06  |
| 80    | 1555226_s_at | C1orf43   | Chromosome 1 open reading frame 43                        | 0.5                          | 3.E-05  |
| 81    | 1559249_at   | ATXN1     | Ataxin 1                                                  | 0.5                          | 2.E-06  |
| 82    | 204286_s_at  | PMAIP1    | Phorbol-12-myristate-13-acetate-induced protein 1         | 0.5                          | 1.E-07  |
| 83    | 229204_at    | HP1-BP74  | Heterochromatin protein 1, binding protein 3              | 0.5                          | < 1e-07 |
| 84    | 219099_at    | C12orf5   | Chromosome 12 open reading frame 5                        | 0.5                          | < 1e-07 |
| 85    | 213183_s_at  | CDKN1C    | Cyclin-dependent kinase inhibitor 1C (p57, Kip2)          | 0.5                          | 2.E-06  |
| 86    | 218611_at    | IER5      | Immediate early response 5                                | 0.5                          | < 1e-07 |
| 87    | 228638_at    | MGC34648  | Family with sequence similarity 76, member A              | 0.4                          | 2.E-07  |
| 88    | 1566403_at   | RNU68     | RNA, U68 small nucleolar                                  | 0.4                          | < 1e-07 |
| 89    | 227897_at    | RAP2B     | RAP2B, member of RAS oncogene family                      | 0.4                          | 4.E-07  |
| 90    | 229397_s_at  | GRLF1     | Glucocorticoid receptor DNA binding factor 1              | 0.4                          | 3.E-07  |
| 91    | 216609_at    | TXN       | Thioredoxin                                               | 0.4                          | 1.E-07  |
| 92    | 222487_s_at  | RPS27L    | Ribosomal protein S27-like                                | 0.4                          | < 1e-07 |
| 93    | 228746_s_at  | H41       | Hypothetical protein H41                                  | 0.4                          | 3.E-06  |
| 94    | 230659_at    | EDEM1     | ER degradation enhancer, mannosidase alpha-like 1         | 0.4                          | 3.E-04  |
| 95    | 213872_at    | C6orf62   | Chromosome 6 open reading frame 62                        | 0.4                          | 5.E-07  |
| 96    | 228030_at    | RBM6      | RNA binding motif protein 6                               | 0.4                          | 2.E-04  |
| 97    | 230333_at    | SAT       | Spermidine/spermine N1-acetyltransferase                  | 0.4                          | 5.E-07  |
| 98    | 201694_s_at  | EGR1      | Early growth response 1                                   | 0.3                          | 6.E-07  |
| 99    | 227404_s_at  | EGR1      | Early growth response 1                                   | 0.3                          | 3.E-07  |
| 100   | 212834_at    | DDX52     | DEAD (Asp-Glu-Ala-Asp) box polypeptide 52                 | 0.3                          | < 1e-07 |
| 101   | 231193_s_at  |           | CDNA clone IMAGE:4285619                                  | 0.3                          | < 1e-07 |
| 102   | 1559343_at   | UBE3A     | Ubiquitin protein ligase E3A                              | 0.3                          | < 1e-07 |
| 103   | 244546_at    | CYCS      | Cytochrome c, somatic                                     | 0.3                          | < 1e-07 |
| 104   | 220494_s_at  |           |                                                           | 0.3                          | 2.E-05  |
| 105   | 232392_at    | SFRS3     | Splicing factor, arginine/serine-rich 3                   | 0.3                          | < 1e-07 |
| 106   | 228834_at    | TOB1      | Transducer of ERBB2, 1                                    | 0.3                          | 9.E-07  |
| 107   | 214395_x_at  | EEF1D     | Eukaryotic translation elongation factor 1 delta          | 0.3                          | 1.E-07  |
| 108   | 214041_x_at  | RPL37A    | Ribosomal protein L37a                                    | 0.2                          | < 1e-07 |

**Table S4. Genotyping of 5 *TOB1* SNPs in patients with mild (*n* = 62) or severe (*n* = 74) MS**

| Marker     | Alleles | Logistic regression           |                      | Allele case-control |                       |
|------------|---------|-------------------------------|----------------------|---------------------|-----------------------|
|            |         | Genotype <i>P</i> value (FDR) | Trend <i>P</i> (FDR) | OR                  | Allele <i>P</i> (FDR) |
| rs11079937 | A/G     | 0.2957 (0.4928)               | 0.1197 (0.1995)      | 1.55                | 0.075928 (0.1265)     |
| rs9905480  | C/T     | 0.4408 (0.5510)               | 0.8671 (0.8671)      | 1.01                | 0.951641 (0.9516)     |
| rs9303568  | C/T     | 0.9449 (0.9449)               | 0.7719 (0.8671)      | 0.93                | 0.767137 (0.9516)     |
| rs4626     | A/G     | 0.0515 (0.2200)               | 0.0142 (0.0710)      | 0.50                | 0.00882 (0.0441)      |
| rs7221352  | A/G     | 0.088 (0.2200)                | 0.0789 (0.1972)      | 1.74                | 0.02777 (0.0694)      |

FDR, false discovery rate.

## Other Supporting Information Files

[Table S1 \(XLS\)](#)
